# Intraoperative Glycemic Control to Prevent Delirium after Cardiac Surgery

## *Steering a Course between Scylla and Charybdis*

Miles Berger, M.D., Ph.D., Jeffrey Browndyke, Ph.D., Joseph P. Mathew, M.D., M.B.A., M.H.S.

THE face of delirium is intuitively recognizable to most clinicians (at least in severe cases)—the wandering eyes, the lack of attention and focus, and the sense that a patient is “not all there.” Delirium is a serious postoperative complication with long-term sequelae for patients and families, including persistent cognitive dysfunction,<sup>1</sup> increased hospital length of stay,<sup>2</sup> and increased mortality risk.<sup>3</sup> The recognition of these potentially devastating outcomes is reflected by the increasing number of articles published on this topic recently (fig. 1) and has led to an investigation by Saager *et al.*<sup>4</sup> in this issue of the effects of intraoperative tight glycemic control on the incidence and severity of postoperative delirium.

Despite the straightforward clinical presentation of delirium, its well-defined prognostic implications, and a large research focus, we still lack a clear understanding of what postoperative delirium is at a brain systems level, and also struggle with how to best diagnose delirium. These limitations are not surprising considering that delirium is a disorder of consciousness, and we lack a brain circuit level understanding of consciousness itself. The entire situation is reminiscent of the words of Voltaire who once remarked: “Doctors pour drugs of which they know little, to cure diseases of which they know less, into human beings of whom they know nothing.”

To be fair, there is some evidence that delirium reflects alterations in specific neurotransmitters (reviewed in Inouye *et al.*<sup>5</sup>). But the brain is not simply a soup bowl of

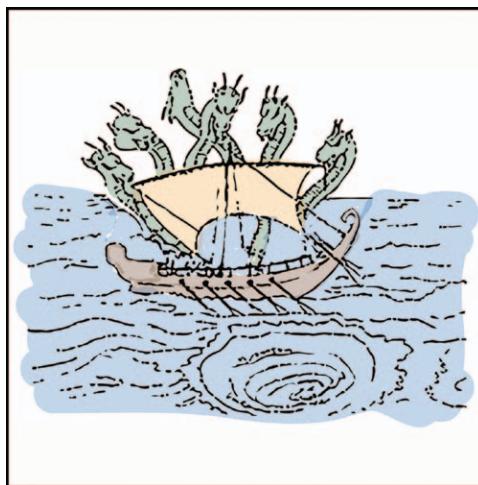

***“... avoiding even mild hypoglycemia may be equally as important as avoiding hyperglycemia when it comes to preventing postoperative delirium, just as avoiding the rocks of Scylla was equally as important as avoiding the whirlpool of Charybdis for sailors in Homer’s Odyssey.”***

neurotransmitters. The 80+ billion neurons that make up the brain<sup>6</sup> are better conceptualized as a circuit board with 80+ billion nodes, each of which is connected to 10,000+ other nodes in the circuit. To say that delirium results from altered neurotransmitter levels is like saying that an error in the function of a computer program results from altered electricity levels inside the computer. Although true, neither statement is particularly informative. Neuroimaging and electroencephalography studies demonstrate that delirium is associated with disruption of cortical and subcortical functional connectivity,<sup>7–9</sup> but the extent of connectivity disruption necessary or sufficient to cause delirium is unknown.

According to the definition in the *Diagnostic and Statistical Manual of Mental Disorders*, 5th edition, inattention is a necessary component of delirium. However, inattention can be measured by a deficit in either simple attention or working memory. Simple attention can be measured by saying the letters SAVEAHAART aloud

and instructing the patient to squeeze the tester’s hand every time he or she hears the letter “A.”<sup>10</sup> Working memory is a more complex cognitive function that requires patients to transiently hold and process information and can be measured by asking a patient to recite the months of the year backward. Working memory declines with age.<sup>11</sup> Thus, classifying patients as delirious if they cannot complete a working memory task risks mislabeling a presurgery working memory deficit as delirium. This is a potential problem if presurgery

Illustration: J. P. Rathmell.

Corresponding article on page 1214.

Accepted for publication February 19, 2015. From the Department of Anesthesiology, Duke University Medical Center, Durham, North Carolina (M.B., J.P.M.); and Geriatric Behavioral Health Division, Department of Psychiatry & Behavioral Sciences, Duke University Medical Center, Durham, North Carolina (J.B.).

Copyright © 2015, the American Society of Anesthesiologists, Inc. Wolters Kluwer Health, Inc. All Rights Reserved. *Anesthesiology* 2015; 122:1186-8

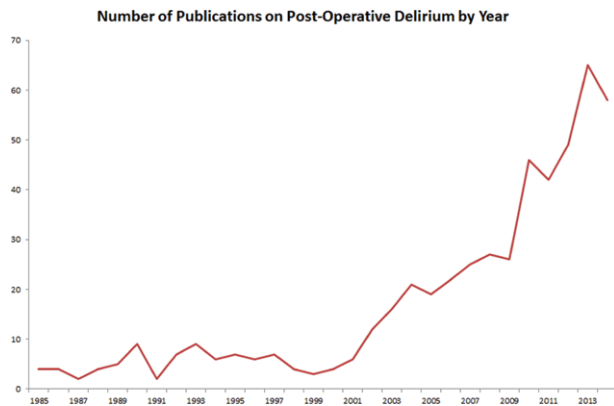

**Fig. 1.** This figure was made using Microsoft Excel (Microsoft Corporation, USA), with data obtained from performing a PubMed search using the terms “Postoperative Delirium” and each successive publication year from 1984 through 2014.

baseline cognitive assessments are unavailable, as in the study by Saager *et al.*

Other challenges to accurately diagnose delirium include the influence of practice effects on repeated delirium assessments<sup>12</sup> and the difficulty in quantifying the degree of “clinically meaningful” postsurgery cognitive change necessary for delirium.<sup>13</sup> Education level (“cognitive reserve”) and varying cognitive effort on the part of patients may also affect the sensitivity of delirium detection.<sup>14</sup> These challenges may explain why studies have detected delirium rates after cardiac surgery ranging from more than 50%<sup>15</sup> to less than 15%<sup>16</sup> and argue strongly for a multidisciplinary approach to delirium detection, monitoring, and treatment.

Despite these challenges, the clear long-term sequelae of postoperative delirium mandate that we as physicians attempt to prevent it even if we do not fully understand what causes it or how best to measure it.<sup>17</sup> Recent attention has focused on inflammation as a contributor to postoperative delirium<sup>18</sup> and possibly to longer term cognitive dysfunction as well.<sup>19,20</sup> Hyperglycemia has also been identified as a possible contributor to adverse postoperative outcomes<sup>21</sup> and has been correlated with increased inflammation.<sup>22</sup> Conversely, insulin administration decreases inflammation.<sup>23</sup>

On the basis of these findings, Saager *et al.*<sup>4</sup> now report the results of a randomized double-blind trial that examined the effect of tight intraoperative glycemic control (*via* a hyperinsulinemic–normoglycemic clamp) *versus* standard glycemic control, on the incidence of postoperative delirium in patients undergoing cardiac surgery. Surprisingly, and contrary to the hypothesis of authors, patients in the tight glycemic control arm of the study had a higher incidence of delirium.

*Are these results valid?* Aside from insulin administration, intraoperative characteristics were generally similar among patients in both study arms (table 2 of Saager *et al.*<sup>4</sup>). Surgery duration, clamp time, and bypass time were all slightly longer in the tight glycemic control arm, although these

differences were small relative to the differences in insulin administration. Thus, it is likely that the differences in delirium outcomes between the study arms are primarily due to the differences in insulin administration.

*What do these results mean?* This trial was based on the rationale that hyperglycemia has been associated with adverse events, although not with delirium itself *per se*,<sup>21</sup> and that insulin therapy has antiinflammatory effects that would decrease delirium incidence if delirium is caused by inflammation. However, even mild hypoglycemia is associated with alterations in cognitive performance,<sup>24</sup> and brain function and connectivity.<sup>24–26</sup> Indeed, hypoglycemic episodes in patients with type II diabetes even predict the development of dementia.<sup>27</sup> Consistent with this literature, Saager *et al.*<sup>4</sup> report a trend toward *increased* delirium rates with each 10 mg/dl decrease in glucose levels. This finding barely missed statistical significance ( $P = 0.06$ ), likely due to insufficient power (a type II error). Thus, one interpretation of the study results is that the increased incidence of mild hypoglycemia in the tight glycemic control arm adversely affected neurocognitive function and led to postoperative delirium.

*Where do we go from here?* The results of this trial fit nicely with other studies showing that tight glycemic control is associated with increased adverse event rates compared with standard glycemic control<sup>28</sup> and suggest that providers should consider avoiding tight glycemic control in cardiac surgery. Saager *et al.*<sup>4</sup> should be praised for the extraordinary effort that went into carrying out this study on the effect of tight intraoperative glycemic control on postoperative complications including delirium. Overall, the results suggest that avoiding even mild hypoglycemia may be equally as important as avoiding hyperglycemia when it comes to preventing postoperative delirium, just as avoiding the rocks of Scylla was equally as important as avoiding the whirlpool of Charybdis for sailors in Homer’s *Odyssey*.

This article also raises several questions for future inquiry: Would tight glycemic control be more beneficial during the postoperative period than during surgery itself? This issue is relevant because mild hypothermia increases insulin resistance,<sup>29</sup> and thus, mild hypothermia during cardiopulmonary bypass may also attenuate the antiinflammatory effects of insulin. More broadly, these results suggest that improving our understanding of what delirium is at a brain systems level and from a neuropsychological perspective may allow us to design interventions that will have a high likelihood of preventing delirium and its long-term sequelae.

### Competing Interests

The authors are not supported by, nor maintain any financial interest in, any commercial activity that may be associated with the topic of this article.

### Correspondence

Address correspondence to Dr. Berger: miles.berger@duke.edu

## References

1. Saczynski JS, Marcantonio ER, Quach L, Fong TG, Gross A, Inouye SK, Jones RN: Cognitive trajectories after postoperative delirium. *N Engl J Med* 2012; 367:30–9
2. Smith PJ, Rivelli SK, Waters AM, Hoyle A, Durheim MT, Reynolds JM, Flowers M, Davis RD, Palmer SM, Mathew JP, Blumenthal JA: Delirium affects length of hospital stay after lung transplantation. *J Crit Care* 2015; 30:126–9
3. Abelha FJ, Luís C, Veiga D, Parente D, Fernandes V, Santos P, Botelho M, Santos A, Santos C: Outcome and quality of life in patients with postoperative delirium during an ICU stay following major surgery. *Crit Care* 2013; 17:R257
4. Saager L, Duncan AE, Yared J-P, Hesler BD, You J, Deogaonkar A, Sessler DI, Kurz A: Intraoperative tight glucose control using hyperinsulinemic normoglycemia increases delirium after cardiac surgery. *ANESTHESIOLOGY* 2015; 122:1214–23
5. Inouye SK, Westendorp RG, Saczynski JS: Delirium in elderly people. *Lancet* 2014; 383:911–22
6. Azevedo FA, Carvalho LR, Grinberg LT, Farfel JM, Ferretti RE, Leite RE, Jacob Filho W, Lent R, Herculano-Houzel S: Equal numbers of neuronal and nonneuronal cells make the human brain an isometrically scaled-up primate brain. *J Comp Neurol* 2009; 513:532–41
7. Choi SH, Lee H, Chung TS, Park KM, Jung YC, Kim SI, Kim JJ: Neural network functional connectivity during and after an episode of delirium. *Am J Psychiatry* 2012; 169:498–507
8. Mashour GA, Avidan MS: Postoperative delirium: Disconnecting the network? *ANESTHESIOLOGY* 2014; 121:214–6
9. van Dellen E, van der Kooi AW, Numan T, Koek HL, Klijn FA, Buijsrogge MP, Stam CJ, Slooter AJ: Decreased functional connectivity and disturbed directionality of information flow in the electroencephalography of intensive care unit patients with delirium after cardiac surgery. *ANESTHESIOLOGY* 2014; 121:328–35
10. Ely EW, Inouye SK, Bernard GR, Gordon S, Francis J, May L, Truman B, Speroff T, Gautam S, Margolin R, Hart RP, Dittus R: Delirium in mechanically ventilated patients: Validity and reliability of the confusion assessment method for the intensive care unit (CAM-ICU). *JAMA* 2001; 286:2703–10
11. Gazzaley A, Sheridan MA, Cooney JW, D'Esposito M: Age-related deficits in component processes of working memory. *Neuropsychology* 2007; 21:532–9
12. Duff K, Callister C, Dennett K, Tomietich D: Practice effects: A unique cognitive variable. *Clin Neuropsychol* 2012; 26:1117–27
13. Heaton RK, Temkin N, Dikmen S, Avitable N, Taylor MJ, Marcotte TD, Grant I: Detecting change: A comparison of three neuropsychological methods, using normal and clinical samples. *Arch Clin Neuropsychol* 2001; 16:75–91
14. Esposito F, Gendolla GH, Van der Linden M: Are self-efficacy beliefs and subjective task demand related to apathy in aging? *Aging Ment Health* 2014; 18:521–30
15. Rudolph JL, Jones RN, Levkoff SE, Rockett C, Inouye SK, Sellke FW, Khuri SF, Lipsitz LA, Ramlawi B, Levitsky S, Marcantonio ER: Derivation and validation of a preoperative prediction rule for delirium after cardiac surgery. *Circulation* 2009; 119:229–36
16. Sauër AM, Slooter AJ, Veldhuijzen DS, van Eijk MM, Devlin JW, van Dijk D: Intraoperative dexamethasone and delirium after cardiac surgery: A randomized clinical trial. *Anesth Analg* 2014; 119:1046–52
17. Berger M, Nadler J, Mathew JP: Preventing delirium after cardiothoracic surgery: Provocative but preliminary evidence for bispectral index monitoring. *Anesth Analg* 2014; 118:706–7
18. Cape E, Hall RJ, van Munster BC, de Vries A, Howie SE, Pearson A, Middleton SD, Gillies F, Armstrong IR, White TO, Cunningham C, de Rooij SE, MacLulich AM: Cerebrospinal fluid markers of neuroinflammation in delirium: A role for interleukin-1 $\beta$  in delirium after hip fracture. *J Psychosom Res* 2014; 77:219–25
19. Nadelson MR, Sanders RD, Avidan MS: Perioperative cognitive trajectory in adults. *Br J Anaesth* 2014; 112:440–51
20. Su X, Feng X, Terrando N, Yan Y, Chawla A, Koch LG, Britton SL, Matthay MA, Maze M: Dysfunction of inflammation-resolving pathways is associated with exaggerated postoperative cognitive decline in a rat model of the metabolic syndrome. *Mol Med* 2012; 18:1481–90
21. Ganai S, Lee KF, Merrill A, Lee MH, Bellantonio S, Brennan M, Lindenauer P: Adverse outcomes of geriatric patients undergoing abdominal surgery who are at high risk for delirium. *Arch Surg* 2007; 142:1072–8
22. Heier M, Margeisdottir HD, Brunborg C, Hanssen KF, Dahl-Jørgensen K, Seljelot I: Inflammation in childhood type 1 diabetes; influence of glycemic control. *Atherosclerosis* 2015; 238:33–7
23. Hansen TK, Thiel S, Wouters PJ, Christiansen JS, Van den Berghe G: Intensive insulin therapy exerts antiinflammatory effects in critically ill patients and counteracts the adverse effect of low mannose-binding lectin levels. *J Clin Endocrinol Metab* 2003; 88:1082–8
24. Schafer RJ, Page KA, Arora J, Sherwin R, Constable RT: BOLD response to semantic and syntactic processing during hypoglycemia is load-dependent. *Brain Lang* 2012; 120:1–14
25. Sejling AS, Kjaer TW, Pedersen-Bjergaard U, Diemar SS, Frandsen CS, Hilsted L, Faber J, Holst JJ, Tarnow L, Nielsen MN, Remvig LS, Thorsteinsson B, Juhl CB: Hypoglycemia-associated changes in the electroencephalogram in patients with type 1 diabetes and normal hypoglycemia awareness or unawareness. *Diabetes* 2014 [Epub ahead of print]
26. Teves D, Videen TO, Cryer PE, Powers WJ: Activation of human medial prefrontal cortex during autonomic responses to hypoglycemia. *Proc Natl Acad Sci USA* 2004; 101:6217–21
27. Whitmer RA, Karter AJ, Yaffe K, Quesenberry CP Jr, Selby JV: Hypoglycemic episodes and risk of dementia in older patients with type 2 diabetes mellitus. *JAMA* 2009; 301:1565–72
28. NICE-SUGAR Study Investigators, Finfer S, Liu B, Chittock DR, Norton R, Myburgh JA, McArthur C, Mitchell I, Foster D, Dhingra V, Henderson WR, Ronco JJ, Bellomo R, Cook D, McDonald E, Dodek P, Hébert PC, Heyland DK, Robinson BG: Hypoglycemia and risk of death in critically ill patients. *N Engl J Med* 2012; 367:1108–18
29. Sah Pri A, Chase JG, Pretty CG, Shaw GM, Preiser JC, Vincent JL, Oddo M, Taccone FS, Penning S, Desai T: Evolution of insulin sensitivity and its variability in out of hospital cardiac arrest (OHCA) patients treated with hypothermia. *Crit Care* 2014; 18:586
